# Supplementary material for: SFITTER: A tool to determine supersymmetric parameters
Source: MDPI journal article supplement (doi:10.3390/ijms232113590), 2003-05-26
Supplement: s1 [file s1]

Supplementary materials

Figure S1. lncRNA-miRNA-mRNA pairs with targeted regulation existing in ceRNA network

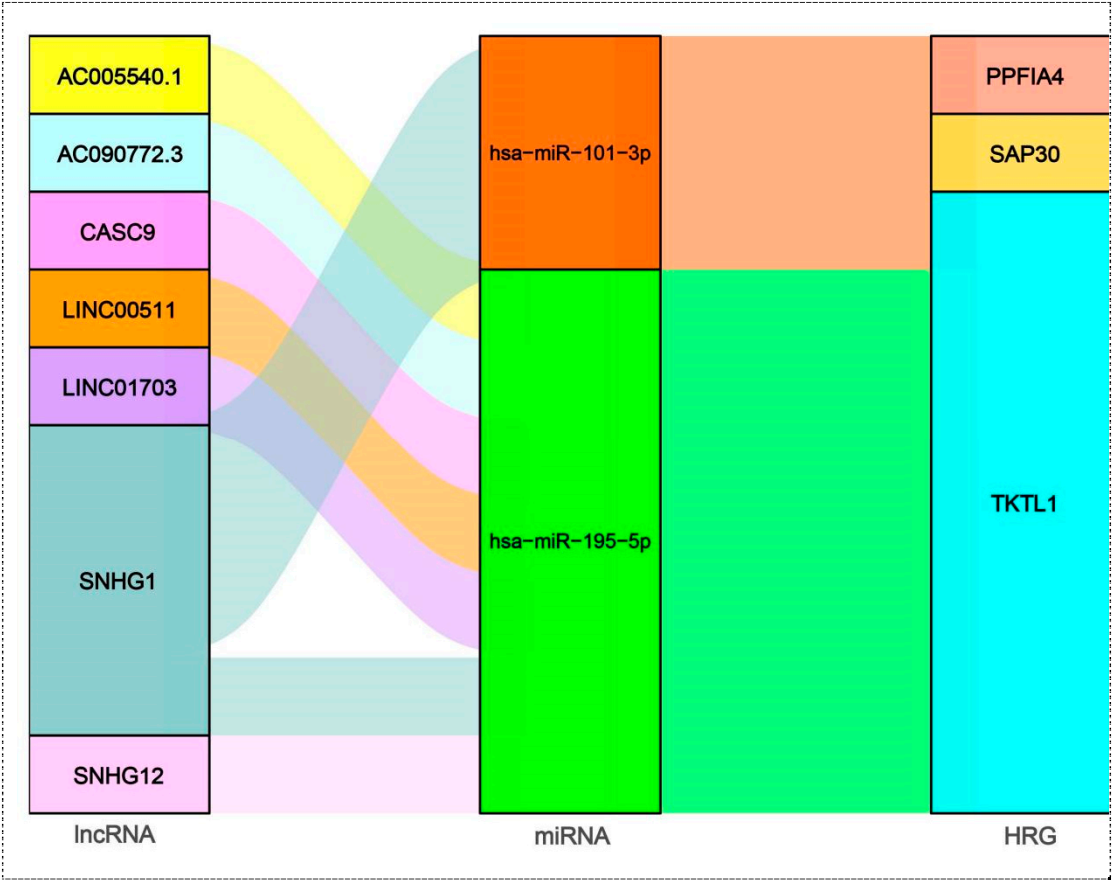

**Table S4.** Survival related DE-lncRNAs screened by univariate Cox analysis

| id         | HR          | HR.95L      | HR.95H      | P-value     |
|------------|-------------|-------------|-------------|-------------|
| TMCC1-AS1  | 1.562172345 | 1.329864422 | 1.835061074 | 5.62E-08    |
| DNAJC9-AS1 | 1.531626021 | 1.174656455 | 1.997076047 | 0.001638494 |
| BACE1-AS   | 1.458556546 | 1.134663694 | 1.874905499 | 0.003218704 |
| AL354824.2 | 1.445181061 | 1.246535614 | 1.675482254 | 1.06E-06    |
| LINC01665  | 1.435707001 | 1.207630672 | 1.70685843  | 4.18E-05    |
| AL592043.1 | 1.432953689 | 1.239211913 | 1.656985584 | 1.21E-06    |
| KDM4A-AS1  | 1.43034944  | 1.173514187 | 1.743395643 | 0.000393398 |
| AL355574.1 | 1.429475763 | 1.189335324 | 1.718103309 | 0.000140191 |
| DDX11-AS1  | 1.412342023 | 1.19290224  | 1.67214875  | 6.14E-05    |
| AC025524.2 | 1.409164231 | 1.2084477   | 1.643218675 | 1.21E-05    |
| LINC01138  | 1.408310681 | 1.174723365 | 1.688345556 | 0.000215373 |
| SNHG20     | 1.401585143 | 1.084084875 | 1.812072982 | 0.009995028 |
| SREBF2-AS1 | 1.388937754 | 1.136593138 | 1.697307524 | 0.001320286 |
| AL118511.1 | 1.387692464 | 1.171869401 | 1.643263637 | 0.000145363 |
| SNHG3      | 1.386987607 | 1.18162849  | 1.628036763 | 6.30E-05    |
| AC073611.1 | 1.373484703 | 1.132213903 | 1.666169463 | 0.001282613 |
| AC012073.1 | 1.366678428 | 1.176886477 | 1.587077396 | 4.22E-05    |
| GSEC       | 1.364683111 | 1.158411779 | 1.607683923 | 0.00020023  |
| LINC01747  | 1.35218297  | 1.127379382 | 1.621813218 | 0.001144461 |
| DEPDC1-AS1 | 1.346697063 | 1.149950455 | 1.57710532  | 0.00022088  |
| AC012339.1 | 1.342266385 | 1.147109516 | 1.570625142 | 0.000240596 |
| AC006252.1 | 1.341186417 | 1.148189158 | 1.566624272 | 0.00021292  |
| AC091173.1 | 1.339261905 | 1.133665966 | 1.582143687 | 0.000591795 |
| FAM242A    | 1.339211548 | 1.132994893 | 1.582961742 | 0.00061817  |
| UBE2E1-AS1 | 1.338849772 | 1.091732739 | 1.641902497 | 0.005062866 |
| AL158166.1 | 1.337268495 | 1.142905213 | 1.564685337 | 0.000286862 |
| AL162574.2 | 1.337259803 | 1.135022418 | 1.575531684 | 0.000513025 |
| AC084033.3 | 1.330737767 | 1.120581249 | 1.580307547 | 0.001121478 |
| AP002852.1 | 1.328595353 | 1.145085897 | 1.541513713 | 0.000179416 |
| AL513320.1 | 1.327888469 | 1.100768945 | 1.601869126 | 0.003045323 |
| AP001469.3 | 1.327868133 | 1.139488748 | 1.547390249 | 0.000280392 |
| AC007687.1 | 1.324919795 | 1.096371932 | 1.601110364 | 0.003587238 |
| AC022639.1 | 1.323816241 | 1.131637182 | 1.548631899 | 0.000456215 |
| SNHG1      | 1.32368043  | 1.06147552  | 1.650655005 | 0.01278691  |
| AL442125.2 | 1.323388055 | 1.12258012  | 1.560116657 | 0.000846555 |
| AL450468.2 | 1.321487993 | 1.133395986 | 1.54079469  | 0.000373122 |
| AC069544.1 | 1.321128732 | 1.056532433 | 1.651990107 | 0.014596993 |
| LINC02003  | 1.314218187 | 1.135340015 | 1.521279458 | 0.000251875 |
| HDAC11-AS1 | 1.313869361 | 1.087418842 | 1.587477274 | 0.004679933 |
| AP000526.1 | 1.313287328 | 1.126330693 | 1.531276397 | 0.000504614 |
| GACAT3     | 1.311420557 | 1.109497667 | 1.550092378 | 0.00148311  |
| AL024498.1 | 1.311365523 | 1.098108154 | 1.566038399 | 0.002758044 |

|            |             |             |             |             |
|------------|-------------|-------------|-------------|-------------|
| AC005332.5 | 1.309542455 | 1.071986676 | 1.599741377 | 0.008275293 |
| AC025176.1 | 1.309144167 | 1.138882431 | 1.504859856 | 0.000151011 |
| Z93403.1   | 1.306782245 | 1.142799474 | 1.494295259 | 9.19E-05    |
| SNHG12     | 1.305306667 | 1.047996921 | 1.625792463 | 0.017385015 |
| AC003092.1 | 1.304877918 | 1.078178161 | 1.579243989 | 0.006275219 |
| AC004816.1 | 1.30292278  | 1.124169209 | 1.510099865 | 0.000440512 |
| AC009005.1 | 1.302658184 | 1.146991905 | 1.47945102  | 4.66E-05    |
| AC034229.4 | 1.302083291 | 1.109166055 | 1.528554618 | 0.001253941 |
| MIR137HG   | 1.301065182 | 1.14057391  | 1.484139337 | 8.92E-05    |
| AC114812.2 | 1.299549845 | 1.070321456 | 1.577871572 | 0.008136814 |
| AC006372.1 | 1.298594929 | 1.120507172 | 1.504987055 | 0.000516858 |
| LINC01060  | 1.298571089 | 1.162192592 | 1.45095304  | 3.93E-06    |
| AC012676.1 | 1.298494305 | 1.120036134 | 1.505386665 | 0.00053462  |
| AC110285.3 | 1.296857709 | 1.145800884 | 1.467829132 | 3.89E-05    |
| AC010864.1 | 1.296432959 | 1.044637935 | 1.608919571 | 0.018456846 |
| AC004923.4 | 1.2963718   | 1.090049679 | 1.541746103 | 0.003336981 |
| LINC00462  | 1.295940199 | 1.138285148 | 1.475430827 | 8.96E-05    |
| AC114803.1 | 1.295881238 | 1.13248806  | 1.482848467 | 0.000163698 |
| AC005291.2 | 1.295788899 | 1.09974855  | 1.526775252 | 0.001961374 |
| AC131009.1 | 1.295396949 | 1.106713941 | 1.516248412 | 0.001271333 |
| AC011352.3 | 1.294980977 | 1.117420819 | 1.50075576  | 0.000591461 |
| FILNC1     | 1.294910435 | 1.101815796 | 1.521845158 | 0.001708048 |
| AC022007.1 | 1.293971911 | 1.074912548 | 1.55767398  | 0.006462803 |
| AC026250.1 | 1.293689137 | 1.135277592 | 1.47420472  | 0.000111657 |
| RHPN1-AS1  | 1.293423573 | 1.117210688 | 1.497429767 | 0.000574848 |
| LINC00165  | 1.292622767 | 1.08528455  | 1.539571918 | 0.004008838 |
| AL136529.1 | 1.29172709  | 1.103402557 | 1.512194134 | 0.001453431 |
| C7orf71    | 1.291222943 | 1.064860881 | 1.565703763 | 0.00934945  |
| AC068025.1 | 1.290965512 | 1.116561771 | 1.492610617 | 0.00056294  |
| AC027237.2 | 1.290771454 | 1.063257941 | 1.566967791 | 0.009881021 |
| LINC01134  | 1.289031806 | 1.108694093 | 1.498702851 | 0.000960474 |
| SPRY4-AS1  | 1.287329197 | 1.137735938 | 1.456591469 | 6.14E-05    |
| AL353708.1 | 1.286877488 | 1.061412353 | 1.560235912 | 0.010275407 |
| AC010547.1 | 1.285815461 | 1.048209059 | 1.577282114 | 0.01588114  |
| AC010789.1 | 1.283060513 | 1.129227104 | 1.457850485 | 0.000130737 |
| AC089983.1 | 1.282461256 | 1.123438508 | 1.463993678 | 0.000230364 |
| AL162431.1 | 1.281322452 | 1.066525395 | 1.539379403 | 0.008098498 |
| U95743.1   | 1.279389623 | 1.125513335 | 1.454303345 | 0.000164274 |
| AC097641.2 | 1.278882816 | 1.035659214 | 1.579227254 | 0.022282947 |
| LINC01517  | 1.278304913 | 1.100927613 | 1.484260575 | 0.001275033 |
| PICSAR     | 1.276644082 | 1.153172575 | 1.413335825 | 2.53E-06    |
| AP003086.2 | 1.275815546 | 1.045369249 | 1.557062549 | 0.01655267  |
| AC026356.2 | 1.275064821 | 1.092261432 | 1.488462608 | 0.00208599  |
| AC025048.4 | 1.273061269 | 1.081486918 | 1.498571057 | 0.003714926 |

|            |             |             |             |             |
|------------|-------------|-------------|-------------|-------------|
| AC008622.2 | 1.273049193 | 1.131820152 | 1.43190086  | 5.72E-05    |
| AL359397.1 | 1.271966232 | 1.074544977 | 1.505658794 | 0.005182989 |
| AL359878.1 | 1.271493667 | 1.093193666 | 1.478874416 | 0.001834245 |
| AJ239322.1 | 1.271265421 | 1.046459744 | 1.544364969 | 0.015633949 |
| AC011773.4 | 1.2706617   | 1.077143016 | 1.4989478   | 0.004490452 |
| LINC01460  | 1.270266209 | 1.088448268 | 1.48245561  | 0.002402855 |
| AC097358.2 | 1.269908444 | 1.081954309 | 1.490513455 | 0.003457796 |
| AC009902.3 | 1.26966149  | 1.067517379 | 1.510083424 | 0.00696735  |
| AL136985.2 | 1.268922723 | 1.056426066 | 1.524162389 | 0.010866112 |
| AF121898.1 | 1.26832724  | 1.057748982 | 1.520827736 | 0.010286418 |
| AC096637.2 | 1.26670263  | 1.090104245 | 1.471910195 | 0.002027541 |
| MYLK-AS1   | 1.266399865 | 1.07189759  | 1.49619575  | 0.005502278 |
| LINC02008  | 1.264927569 | 1.114327733 | 1.435880763 | 0.000279387 |
| LINC01954  | 1.263960737 | 1.132331673 | 1.410891157 | 2.98E-05    |
| AC005540.1 | 1.2638928   | 1.076072372 | 1.484495887 | 0.004328359 |
| CASC11     | 1.263719314 | 1.059410486 | 1.507429392 | 0.009284478 |
| AC007405.1 | 1.263559625 | 1.075695097 | 1.484233711 | 0.004393537 |
| AC011337.1 | 1.263424158 | 1.045354409 | 1.526985097 | 0.01557166  |
| AC124861.1 | 1.262995294 | 1.067736834 | 1.493960928 | 0.006433077 |
| AL133215.2 | 1.262945845 | 1.096483032 | 1.454680246 | 0.001206952 |
| AL592466.1 | 1.26102633  | 1.101874459 | 1.443165682 | 0.000753521 |
| MAGEA4-AS1 | 1.260932002 | 1.124251013 | 1.414230002 | 7.48E-05    |
| AC002116.2 | 1.260027484 | 1.065127245 | 1.490591165 | 0.007020331 |
| EGLN3-AS1  | 1.25987322  | 1.11660379  | 1.421525293 | 0.000176392 |
| LINC02505  | 1.259702549 | 1.131712263 | 1.402167816 | 2.41E-05    |
| AC069148.1 | 1.259382999 | 1.086281662 | 1.46006841  | 0.002235722 |
| AP001011.1 | 1.259228424 | 1.061550539 | 1.49371713  | 0.008156768 |
| AL591501.1 | 1.259203361 | 1.123220298 | 1.411649261 | 7.72E-05    |
| AC106799.2 | 1.258233977 | 1.059580805 | 1.494131201 | 0.00879119  |
| FOXD2-AS1  | 1.257948635 | 1.097415272 | 1.441965325 | 0.000986057 |
| AL358214.1 | 1.257683577 | 1.066755524 | 1.48278396  | 0.006348596 |
| DDN-AS1    | 1.257474393 | 1.0957064   | 1.443125503 | 0.001110803 |
| LINC00412  | 1.255633524 | 1.022897933 | 1.541322448 | 0.029524082 |
| AC022092.1 | 1.254152923 | 1.079899306 | 1.456524275 | 0.003006359 |
| AC008892.1 | 1.253328865 | 1.077893675 | 1.457317433 | 0.003336562 |
| AC013565.1 | 1.252407852 | 1.052412879 | 1.490408811 | 0.011230061 |
| TDRKH-AS1  | 1.252186384 | 1.048518734 | 1.495415093 | 0.013025121 |
| CYTOR      | 1.251904908 | 1.095864982 | 1.430163318 | 0.000940424 |
| AC007998.3 | 1.251140002 | 1.097482992 | 1.426310307 | 0.000804335 |
| AC090673.1 | 1.251077822 | 1.057981109 | 1.479417451 | 0.008821003 |
| AL353807.2 | 1.250379193 | 1.039476449 | 1.504072678 | 0.017752062 |
| AP002478.1 | 1.249397957 | 1.145434162 | 1.362797886 | 5.08E-07    |
| AL160162.1 | 1.248598441 | 1.116423733 | 1.396421467 | 0.000100622 |
| AL451074.2 | 1.247965047 | 1.051001896 | 1.481840104 | 0.011485807 |

|             |             |             |             |             |
|-------------|-------------|-------------|-------------|-------------|
| AC010973.2  | 1.247942253 | 1.012649981 | 1.537905393 | 0.037719375 |
| AC027088.3  | 1.247402274 | 1.045381099 | 1.488464288 | 0.014194763 |
| AL355488.1  | 1.246331226 | 1.037502211 | 1.49719346  | 0.018600769 |
| AL359694.2  | 1.245802847 | 1.040274697 | 1.491937406 | 0.016885225 |
| AC006449.5  | 1.244798477 | 1.054400662 | 1.469577271 | 0.009726417 |
| AC012103.1  | 1.244090233 | 1.076720777 | 1.437476215 | 0.003049467 |
| AC007368.1  | 1.244009394 | 1.097677769 | 1.409848617 | 0.000627144 |
| AL117335.1  | 1.243673493 | 1.110818128 | 1.392418542 | 0.00015477  |
| AC145343.1  | 1.24336993  | 1.082231611 | 1.428500857 | 0.002098962 |
| AL021154.1  | 1.243068807 | 1.075702512 | 1.436475271 | 0.003187855 |
| AC116025.2  | 1.242903732 | 1.083441668 | 1.425835587 | 0.001909614 |
| AC012640.1  | 1.242892468 | 1.060188518 | 1.457082077 | 0.007352304 |
| AC019080.4  | 1.242755537 | 1.012853819 | 1.52484129  | 0.037311718 |
| APCDD1L-DT  | 1.242392437 | 1.102080701 | 1.400568004 | 0.000385719 |
| LINC02560   | 1.241781248 | 1.057995091 | 1.457493216 | 0.008053571 |
| AL357079.1  | 1.240514727 | 1.032095299 | 1.491021991 | 0.021642232 |
| MIR4435-2HG | 1.239850685 | 1.057481129 | 1.453671068 | 0.008085724 |
| AC012074.1  | 1.239358056 | 1.060373301 | 1.448554381 | 0.007005123 |
| AP003062.1  | 1.239084226 | 1.1085491   | 1.384990272 | 0.000160426 |
| AL513218.1  | 1.238608835 | 1.018370926 | 1.50647648  | 0.032177144 |
| LINC01594   | 1.238179978 | 1.050088149 | 1.459962822 | 0.011043023 |
| LRP4-AS1    | 1.236509593 | 1.066709368 | 1.433338845 | 0.004849966 |
| AC114489.1  | 1.236403362 | 1.118388056 | 1.366871958 | 3.38E-05    |
| AC244090.2  | 1.236151111 | 1.052504932 | 1.451840769 | 0.009777859 |
| AC008667.1  | 1.235123344 | 1.018253746 | 1.498182237 | 0.032066063 |
| MAFG-DT     | 1.235117494 | 1.105359241 | 1.380108084 | 0.000192413 |
| AC090241.3  | 1.234577468 | 1.046777894 | 1.456069653 | 0.012315447 |
| AC020658.4  | 1.234110655 | 1.045128473 | 1.457264965 | 0.013121208 |
| LINC00501   | 1.233186763 | 1.099879663 | 1.382650889 | 0.000329433 |
| DCST1-AS1   | 1.232884138 | 1.064194222 | 1.428313804 | 0.005291336 |
| AC018814.1  | 1.230666377 | 1.044518242 | 1.449988779 | 0.013119868 |
| AC099850.3  | 1.230423901 | 1.101997128 | 1.373817533 | 0.000227071 |
| AC004221.1  | 1.23019736  | 1.062710895 | 1.4240802   | 0.005528375 |
| AC074237.1  | 1.229941985 | 1.081604309 | 1.398623576 | 0.00159805  |
| AC073352.1  | 1.229829431 | 1.039744348 | 1.454665689 | 0.015738169 |
| AL590438.1  | 1.229570904 | 1.075186813 | 1.406122722 | 0.002536434 |
| AC012313.8  | 1.229089634 | 1.047107683 | 1.442699116 | 0.011636126 |
| FLJ36000    | 1.226630718 | 1.106948236 | 1.359253189 | 9.63E-05    |
| AP002360.3  | 1.226369556 | 1.042348417 | 1.442878659 | 0.013894859 |
| DLX2-DT     | 1.226326599 | 1.074465297 | 1.399651466 | 0.002488014 |
| CU634019.6  | 1.225286956 | 1.040067041 | 1.443491685 | 0.015108135 |
| LINC01775   | 1.224728442 | 1.032467552 | 1.452791184 | 0.019982042 |
| PRR7-AS1    | 1.224346389 | 1.078292254 | 1.390183482 | 0.001790159 |
| BX322234.2  | 1.22395067  | 1.081673948 | 1.384941595 | 0.001349783 |

|            |             |             |             |             |
|------------|-------------|-------------|-------------|-------------|
| AL355810.1 | 1.22340678  | 1.00348967  | 1.491519238 | 0.046106141 |
| AC063948.1 | 1.223242965 | 1.012348947 | 1.478070734 | 0.03688051  |
| LINC02393  | 1.223067494 | 1.04255498  | 1.434834732 | 0.013456081 |
| AP000897.2 | 1.222136582 | 1.017378479 | 1.468104404 | 0.032023421 |
| AL121757.1 | 1.221775188 | 1.067650745 | 1.398148802 | 0.00359771  |
| AL121672.3 | 1.221504005 | 1.016539986 | 1.467794731 | 0.032759986 |
| SNHG4      | 1.22139979  | 1.078766106 | 1.382892397 | 0.001596093 |
| LINC01967  | 1.220048763 | 1.070208811 | 1.390867808 | 0.002931078 |
| AC104823.1 | 1.22003075  | 1.01927795  | 1.460322996 | 0.03014876  |
| SNAP47-AS1 | 1.219210765 | 1.004388164 | 1.479980493 | 0.045044346 |
| AP001972.4 | 1.218811741 | 1.098749933 | 1.351992856 | 0.000184159 |
| AC006557.1 | 1.218733423 | 1.02809306  | 1.444724427 | 0.022655862 |
| LINC02293  | 1.217360196 | 1.073191696 | 1.380895746 | 0.002225759 |
| WASIR2     | 1.217278177 | 1.067294389 | 1.388338753 | 0.003381689 |
| AC087741.2 | 1.216461414 | 1.040726839 | 1.421870098 | 0.013838848 |
| AC015722.2 | 1.216198148 | 1.078326368 | 1.371697828 | 0.001430774 |
| AC138646.1 | 1.215817362 | 1.020752893 | 1.448158382 | 0.028511461 |
| AC048344.4 | 1.215813449 | 1.02490614  | 1.442280697 | 0.024945515 |
| AL450322.2 | 1.214582904 | 1.075513174 | 1.371635109 | 0.00172851  |
| AC233280.1 | 1.213003148 | 1.04051121  | 1.414090135 | 0.013609765 |
| AC011815.1 | 1.212764686 | 1.036624216 | 1.418834484 | 0.015987845 |
| AL160286.2 | 1.211564066 | 1.035562719 | 1.41747811  | 0.016561399 |
| AC004466.2 | 1.211370508 | 1.012294463 | 1.449596498 | 0.036316628 |
| LINC02313  | 1.211321751 | 1.108656476 | 1.323494172 | 2.21E-05    |
| AC023824.1 | 1.209558081 | 1.074450025 | 1.361655468 | 0.001642748 |
| LINC01090  | 1.209454872 | 1.034051164 | 1.414611905 | 0.017368371 |
| MYOSLID    | 1.209077577 | 1.024744469 | 1.426568896 | 0.024475128 |
| AC011306.1 | 1.208221468 | 1.007284375 | 1.44924229  | 0.041532737 |
| AC090192.2 | 1.208195991 | 1.115420028 | 1.308688671 | 3.49E-06    |
| AC092171.2 | 1.207967304 | 1.039579158 | 1.403630495 | 0.013635148 |
| AC091057.1 | 1.20790713  | 1.049558946 | 1.39014549  | 0.008422907 |
| AL157714.2 | 1.207306148 | 1.04618984  | 1.393234841 | 0.009942136 |
| AC026254.2 | 1.207267909 | 1.026876478 | 1.419348709 | 0.022539097 |
| AC015961.2 | 1.207102495 | 1.045187207 | 1.394100908 | 0.010425194 |
| AL161729.4 | 1.206948956 | 1.037306931 | 1.404334377 | 0.014936234 |
| AC020915.2 | 1.206857221 | 1.029780467 | 1.414383354 | 0.020208958 |
| AC048337.1 | 1.206678247 | 1.032460954 | 1.410292939 | 0.018200684 |
| AC091057.4 | 1.205803361 | 1.044494721 | 1.392024025 | 0.010646679 |
| AC022211.1 | 1.205120669 | 1.001202718 | 1.450571198 | 0.048532892 |
| AC007128.2 | 1.205037557 | 1.048598711 | 1.384815277 | 0.008567976 |
| AC131956.2 | 1.204598217 | 1.014770664 | 1.429935764 | 0.033374401 |
| AC016642.1 | 1.203992099 | 1.033314665 | 1.402861125 | 0.017306454 |
| LINC02046  | 1.20377694  | 1.065134771 | 1.360465324 | 0.002971224 |
| AC010487.2 | 1.203590655 | 1.052148245 | 1.376831138 | 0.006915944 |

|             |             |             |             |             |
|-------------|-------------|-------------|-------------|-------------|
| AC079174.2  | 1.202710574 | 1.008186006 | 1.434767707 | 0.040312274 |
| AL445228.2  | 1.202612801 | 1.063742306 | 1.359612701 | 0.003208753 |
| AC097461.1  | 1.20216885  | 1.020746148 | 1.415836784 | 0.027385803 |
| AC092131.1  | 1.202105663 | 1.02529919  | 1.409401313 | 0.023343343 |
| AC009902.2  | 1.202102091 | 1.021441993 | 1.414715126 | 0.026740235 |
| TM4SF19-AS1 | 1.201655514 | 1.023556639 | 1.410743598 | 0.024804092 |
| AL442067.1  | 1.201527688 | 1.000020188 | 1.443639639 | 0.049974811 |
| AL049539.1  | 1.200997982 | 1.019187851 | 1.415240726 | 0.028749635 |
| PCAT6       | 1.200471148 | 1.050702954 | 1.371587443 | 0.00720035  |
| AC100812.1  | 1.200422455 | 1.011201695 | 1.425051081 | 0.036866085 |
| AC012360.1  | 1.200033746 | 1.0138282   | 1.420438879 | 0.034039857 |
| AC009121.2  | 1.199791481 | 1.046971028 | 1.374918274 | 0.008785938 |
| AP003469.4  | 1.199589155 | 1.040452808 | 1.383065267 | 0.01220794  |
| AC090772.3  | 1.199416415 | 1.0671599   | 1.348063901 | 0.002285437 |
| LINC01649   | 1.199407811 | 1.030207242 | 1.396397771 | 0.01910209  |
| AC026320.1  | 1.199086704 | 1.046087948 | 1.374462756 | 0.00913613  |
| DSCR10      | 1.198542557 | 1.033813408 | 1.38951986  | 0.01635965  |
| AC079089.1  | 1.198343601 | 1.041472439 | 1.378843388 | 0.011484017 |
| AP001099.1  | 1.1975744   | 1.057171241 | 1.356624535 | 0.004599939 |
| AC027228.2  | 1.197478687 | 1.06632153  | 1.344768126 | 0.002327398 |
| AC025580.1  | 1.197472669 | 1.081741633 | 1.325585287 | 0.000510677 |
| AL355987.4  | 1.197098546 | 1.063679848 | 1.347252118 | 0.002845795 |
| AC083805.1  | 1.196997812 | 1.004911166 | 1.425801415 | 0.043919394 |
| AP005205.2  | 1.196456166 | 1.051798107 | 1.361009634 | 0.006370579 |
| AC138150.2  | 1.196346983 | 1.045004035 | 1.369608208 | 0.009380194 |
| AC040174.1  | 1.196019197 | 1.082374215 | 1.32159645  | 0.000441626 |
| UNC5B-AS1   | 1.195832398 | 1.041172148 | 1.373466555 | 0.011375399 |
| PLBD1-AS1   | 1.195540855 | 1.08168322  | 1.321383109 | 0.000469358 |
| AL035461.2  | 1.195395487 | 1.026854038 | 1.391600283 | 0.021351155 |
| ERVMER61-1  | 1.195381611 | 1.097641281 | 1.301825306 | 4.12E-05    |
| LINC01777   | 1.195255265 | 1.011148749 | 1.412883268 | 0.036629207 |
| AL157395.1  | 1.195059599 | 1.014301325 | 1.408030741 | 0.033198653 |
| AL606468.1  | 1.194291196 | 1.023916814 | 1.393014979 | 0.023763451 |
| C10orf91    | 1.193912936 | 1.107892238 | 1.286612588 | 3.39E-06    |
| LINC01096   | 1.193307303 | 1.054528088 | 1.3503503   | 0.005084336 |
| AC009264.1  | 1.192539156 | 1.061291727 | 1.340017642 | 0.003077269 |
| AC011921.1  | 1.192273869 | 1.008017182 | 1.410211061 | 0.040054026 |
| AC025265.3  | 1.191983435 | 1.033328213 | 1.374998275 | 0.015959623 |
| AC099786.1  | 1.191799985 | 1.01955335  | 1.393146524 | 0.027587505 |
| LINC01508   | 1.191559778 | 1.101345916 | 1.289163273 | 1.28E-05    |
| AC011447.3  | 1.190465098 | 1.054099975 | 1.344471287 | 0.004972836 |
| AL121721.1  | 1.190086634 | 1.074953674 | 1.317550915 | 0.000801623 |
| FIRRE       | 1.18915801  | 1.077827353 | 1.311988203 | 0.000551651 |
| LINC01105   | 1.189150435 | 1.03528078  | 1.365889124 | 0.014269984 |

|            |             |             |             |             |
|------------|-------------|-------------|-------------|-------------|
| AC026355.1 | 1.188509185 | 1.053763846 | 1.340484481 | 0.004909037 |
| AC078778.1 | 1.188467472 | 1.01754582  | 1.388099588 | 0.029292922 |
| CEP83-DT   | 1.188213874 | 1.003540246 | 1.406871539 | 0.045395701 |
| AL451069.3 | 1.188136039 | 1.083556718 | 1.302808817 | 0.000245371 |
| C1orf147   | 1.188038697 | 1.01666162  | 1.388304542 | 0.030168764 |
| AC100791.2 | 1.188002623 | 1.016539457 | 1.388387063 | 0.030293101 |
| AC127496.1 | 1.187593333 | 1.003624409 | 1.405284599 | 0.045274671 |
| AC002378.1 | 1.18752343  | 1.01382831  | 1.390977034 | 0.033156779 |
| AC007128.1 | 1.187199633 | 1.079891325 | 1.305171118 | 0.000385098 |
| AP005328.1 | 1.186802643 | 1.027578808 | 1.37069829  | 0.01980062  |
| AL354760.1 | 1.186442462 | 1.006261343 | 1.398886805 | 0.0419279   |
| AC245100.1 | 1.186119481 | 1.015781742 | 1.385021374 | 0.030933413 |
| AC107959.3 | 1.186007064 | 1.075305193 | 1.30810561  | 0.000644386 |
| FAM182B    | 1.185939193 | 1.05930368  | 1.327713475 | 0.0030773   |
| AL353803.1 | 1.185489563 | 1.007674018 | 1.394682685 | 0.040153814 |
| AC012146.1 | 1.185465319 | 1.031299766 | 1.362676564 | 0.016685981 |
| LINC01424  | 1.185124212 | 1.000244162 | 1.404176551 | 0.049671137 |
| AC024941.2 | 1.184752171 | 1.029752111 | 1.363083107 | 0.017798718 |
| AP000695.2 | 1.183331925 | 1.05785638  | 1.323690504 | 0.003245871 |
| AC026992.1 | 1.183294216 | 1.022440887 | 1.36945345  | 0.023966491 |
| LINC01711  | 1.183230373 | 1.028796061 | 1.360847081 | 0.018383266 |
| AC007064.2 | 1.182762232 | 1.017799631 | 1.374461589 | 0.028511594 |
| AL390728.6 | 1.18274103  | 1.002500417 | 1.395387294 | 0.04663857  |
| AL591845.1 | 1.182735164 | 1.031425507 | 1.35624188  | 0.016261634 |
| AC090921.1 | 1.181758114 | 1.050351161 | 1.32960508  | 0.005490444 |
| AL450322.1 | 1.181563107 | 1.001060412 | 1.394612513 | 0.048553198 |
| AC090578.1 | 1.181015449 | 1.084065811 | 1.286635439 | 0.00014069  |
| LINC00632  | 1.180776685 | 1.084563009 | 1.285525661 | 0.000127166 |
| AC099786.2 | 1.180697284 | 1.03646135  | 1.345005366 | 0.012465651 |
| LINC00336  | 1.180473231 | 1.007557633 | 1.383064356 | 0.04005949  |
| AC007773.1 | 1.180400356 | 1.033355465 | 1.348369509 | 0.014552223 |
| AP003469.2 | 1.17987506  | 1.079028827 | 1.2901464   | 0.000285089 |
| LINC02434  | 1.179608292 | 1.044573336 | 1.332099599 | 0.00774469  |
| AC011287.1 | 1.179373862 | 1.041527077 | 1.335464758 | 0.009280224 |
| AL928654.1 | 1.179257684 | 1.001350109 | 1.38877369  | 0.048139602 |
| LINC01293  | 1.179110758 | 1.018141468 | 1.36552947  | 0.027804451 |
| BX119904.2 | 1.179057605 | 1.037118028 | 1.340422977 | 0.011840736 |
| LINC01269  | 1.179025942 | 1.066158957 | 1.303841386 | 0.001337773 |
| AC016405.3 | 1.179020574 | 1.042963788 | 1.332826249 | 0.008479163 |
| AC073529.1 | 1.178930395 | 1.005133022 | 1.38277904  | 0.043085213 |
| LINC01230  | 1.178768818 | 1.02945314  | 1.349741793 | 0.017311787 |
| AC100872.1 | 1.17757222  | 1.05508933  | 1.314273867 | 0.00353486  |
| AP005264.3 | 1.177363662 | 1.01143676  | 1.370510987 | 0.03514453  |
| ELDR       | 1.176306173 | 1.007185066 | 1.373825188 | 0.040328767 |



|            |             |             |             |             |
|------------|-------------|-------------|-------------|-------------|
| AL355802.2 | 1.17561624  | 1.006327167 | 1.373383914 | 0.04140318  |
| AC093730.1 | 1.17554004  | 1.009880998 | 1.368373491 | 0.036902901 |
| LINC02561  | 1.174314714 | 1.057100888 | 1.304525485 | 0.002744595 |
| AC015574.1 | 1.174118771 | 1.003486395 | 1.373765399 | 0.045134208 |
| FER1L6-AS2 | 1.173547926 | 1.052295603 | 1.308771728 | 0.00402671  |
| LINC00862  | 1.173367999 | 1.04509221  | 1.317388502 | 0.006796892 |
| AC079160.1 | 1.172916014 | 1.034545558 | 1.329793515 | 0.012766008 |
| SAMMSON    | 1.172382953 | 1.029782473 | 1.334730221 | 0.016239763 |
| SIRLNT     | 1.172056047 | 1.000923118 | 1.372448446 | 0.048675665 |
| LINC00200  | 1.171658421 | 1.076209686 | 1.275572477 | 0.00025819  |
| AL162431.2 | 1.171348851 | 1.002812568 | 1.368209948 | 0.045999339 |
| MELTF-AS1  | 1.171343449 | 1.035065061 | 1.325564476 | 0.012207443 |
| LINC01477  | 1.17089476  | 1.007313187 | 1.36104099  | 0.039891682 |
| LINC01136  | 1.170678244 | 1.051428217 | 1.303453273 | 0.004042028 |
| AC018558.1 | 1.170639336 | 1.009514197 | 1.357481111 | 0.037042399 |
| LINC00520  | 1.170548789 | 1.011340771 | 1.354819767 | 0.034759622 |
| AC106799.3 | 1.170509719 | 1.002327181 | 1.366911951 | 0.04666423  |
| AC093515.1 | 1.169919996 | 1.060772272 | 1.290298429 | 0.001685841 |
| AL138720.1 | 1.169855741 | 1.013752821 | 1.349996199 | 0.03180228  |
| PRRT3-AS1  | 1.169530326 | 1.045030975 | 1.308861859 | 0.006392109 |
| AF254983.1 | 1.168873746 | 1.029372496 | 1.327280299 | 0.016110047 |
| AL139289.2 | 1.168806352 | 1.002922834 | 1.362127016 | 0.045788718 |
| AC109439.2 | 1.168246313 | 1.038938986 | 1.313647352 | 0.009370665 |
| AL161431.1 | 1.167896908 | 1.064489299 | 1.281349834 | 0.001033776 |
| DUXAP8     | 1.167551951 | 1.064647777 | 1.28040239  | 0.000999407 |
| VLDLR-AS1  | 1.167445143 | 1.05444374  | 1.29255655  | 0.002876926 |
| AC112236.1 | 1.167183989 | 1.032473941 | 1.319470071 | 0.01348445  |
| AC132872.2 | 1.166973546 | 1.000764998 | 1.360786257 | 0.048870623 |
| AL359853.1 | 1.166929296 | 1.036555902 | 1.313700478 | 0.010651135 |
| AC073370.1 | 1.166187574 | 1.010032421 | 1.346484953 | 0.036076634 |
| AL022324.3 | 1.165207939 | 1.013518949 | 1.339599564 | 0.031660513 |
| AC006058.3 | 1.164103531 | 1.004442025 | 1.3491441   | 0.04350273  |
| AC108752.1 | 1.164024852 | 1.070737035 | 1.265440357 | 0.00036587  |
| LINC01029  | 1.163889199 | 1.02308319  | 1.324074211 | 0.021063934 |
| PLUT       | 1.162834951 | 1.051152437 | 1.286383474 | 0.00340817  |
| CASC16     | 1.16252122  | 1.007837043 | 1.340946532 | 0.038722707 |
| AL359636.1 | 1.162435887 | 1.005929518 | 1.343292118 | 0.04134092  |
| AL121832.3 | 1.16185487  | 1.005349183 | 1.342724261 | 0.042129948 |
| LINC02154  | 1.161759844 | 1.058807375 | 1.274722832 | 0.00154053  |
| LINC02577  | 1.161154901 | 1.02015578  | 1.321641979 | 0.023692519 |
| AC121247.1 | 1.160967781 | 1.024395321 | 1.315748092 | 0.01941699  |
| LINC00622  | 1.160493588 | 1.017088688 | 1.32411793  | 0.026984257 |
| LINC01116  | 1.159928289 | 1.058169506 | 1.271472698 | 0.001540769 |
| TGFB2-AS1  | 1.159535018 | 1.041830936 | 1.290537083 | 0.006721635 |

|             |             |             |             |             |
|-------------|-------------|-------------|-------------|-------------|
| LINC00628   | 1.15950091  | 1.016850794 | 1.322162867 | 0.027143659 |
| AP000844.2  | 1.158594288 | 1.054373389 | 1.273117037 | 0.002206852 |
| AC145423.2  | 1.158527967 | 1.005140429 | 1.335322916 | 0.042283212 |
| MINCR       | 1.158026575 | 1.004848948 | 1.334554363 | 0.042684243 |
| AC078906.1  | 1.157221174 | 1.003710186 | 1.334210677 | 0.044329155 |
| CDKN2B-AS1  | 1.156619755 | 1.024567305 | 1.305691927 | 0.018655385 |
| LINC01731   | 1.156503778 | 1.021162355 | 1.309782899 | 0.022036035 |
| AC009646.2  | 1.156043178 | 1.014791306 | 1.316956326 | 0.029198931 |
| AL606489.1  | 1.155969505 | 1.017136625 | 1.313752216 | 0.026402031 |
| AP000525.1  | 1.155132244 | 1.032843802 | 1.291899607 | 0.011537139 |
| AC040174.2  | 1.154934319 | 1.021997355 | 1.305163144 | 0.020959492 |
| AC105219.3  | 1.153914107 | 1.020563808 | 1.304688404 | 0.022322558 |
| LINC02345   | 1.153596869 | 1.024993463 | 1.298335827 | 0.017821297 |
| AC040970.1  | 1.152730174 | 1.052551929 | 1.262443038 | 0.002183135 |
| AC245595.1  | 1.152293504 | 1.031414861 | 1.28733875  | 0.012175889 |
| AP001453.2  | 1.151283909 | 1.014429238 | 1.306601377 | 0.029121389 |
| AC122710.1  | 1.150766575 | 1.05973111  | 1.249622379 | 0.000838712 |
| AC016708.1  | 1.150731012 | 1.016628952 | 1.302522282 | 0.026361673 |
| LINC00346   | 1.150491255 | 1.035917083 | 1.277737524 | 0.008812067 |
| AC017076.1  | 1.150202067 | 1.019910823 | 1.297137715 | 0.022526141 |
| AP003900.1  | 1.150185745 | 1.033916691 | 1.27952983  | 0.010070577 |
| AP003419.3  | 1.149758929 | 1.0093928   | 1.309644367 | 0.035667761 |
| AL365295.1  | 1.149249488 | 1.016548146 | 1.299273813 | 0.02627369  |
| LINC02487   | 1.148334753 | 1.031566453 | 1.278320656 | 0.011471526 |
| AL355388.2  | 1.148274071 | 1.017450656 | 1.295918711 | 0.025072393 |
| FP325330.3  | 1.148198343 | 1.001687828 | 1.316138021 | 0.047236087 |
| AC138904.1  | 1.147848656 | 1.022611276 | 1.288423634 | 0.01932037  |
| AC116337.3  | 1.147652336 | 1.002090178 | 1.314358641 | 0.04657583  |
| AC010980.2  | 1.147489737 | 1.028604196 | 1.280116007 | 0.013687856 |
| RNF144A-AS1 | 1.146974312 | 1.053031954 | 1.249297392 | 0.001660042 |
| AC092115.3  | 1.146431258 | 1.042962251 | 1.260165099 | 0.004631762 |
| SRGAP3-AS2  | 1.146400085 | 1.006358609 | 1.305929262 | 0.039848532 |
| LINC01353   | 1.146278903 | 1.005384374 | 1.306918386 | 0.041329018 |
| AL359313.1  | 1.145933073 | 1.056160736 | 1.243335946 | 0.001065175 |
| LINC00578   | 1.14519552  | 1.010544084 | 1.297788785 | 0.033643986 |
| AC016877.3  | 1.144806599 | 1.02538115  | 1.278141449 | 0.0161343   |
| ATP2A1-AS1  | 1.144629683 | 1.016101484 | 1.289415606 | 0.026228666 |
| LINC00460   | 1.144106425 | 1.018934042 | 1.284655785 | 0.022771225 |
| AC005993.1  | 1.144050265 | 1.001362321 | 1.307070359 | 0.04770419  |
| AC108868.2  | 1.143551652 | 1.004697735 | 1.301595829 | 0.042262781 |
| AL163952.1  | 1.143407585 | 1.044609377 | 1.251550039 | 0.003654921 |
| LINC01297   | 1.143294756 | 1.030390293 | 1.268570665 | 0.011593212 |
| LINC00958   | 1.142630982 | 1.063565178 | 1.227574565 | 0.00026801  |
| LINC01804   | 1.141420244 | 1.011575457 | 1.287931774 | 0.031813134 |

|            |             |             |             |             |
|------------|-------------|-------------|-------------|-------------|
| AC233266.2 | 1.140611021 | 1.021509403 | 1.273599144 | 0.019377934 |
| LINC00513  | 1.13998447  | 1.022768425 | 1.270634252 | 0.01795044  |
| AC006946.2 | 1.139561729 | 1.034793676 | 1.254937061 | 0.007929777 |
| AC099066.2 | 1.139357465 | 1.031751698 | 1.258185894 | 0.009951476 |
| MSC-AS1    | 1.139238822 | 1.048867627 | 1.237396464 | 0.001992166 |
| PINCR      | 1.139160678 | 1.007956303 | 1.287443758 | 0.036897478 |
| AL512598.1 | 1.13903889  | 1.016865866 | 1.275890592 | 0.024519838 |
| AP005230.1 | 1.138117182 | 1.02456194  | 1.264258089 | 0.015846564 |
| AC131391.1 | 1.137211824 | 1.017817612 | 1.27061147  | 0.02308446  |
| LINC01694  | 1.13661947  | 1.053475876 | 1.226325015 | 0.000952852 |
| HCG20      | 1.136187258 | 1.0131212   | 1.274202421 | 0.029048363 |
| LINC01703  | 1.136136444 | 1.015869652 | 1.270641384 | 0.025366704 |
| CASC15     | 1.135699647 | 1.034880408 | 1.246340812 | 0.007300381 |
| LINC01992  | 1.134604396 | 1.018761428 | 1.263619824 | 0.02154818  |
| LINC00839  | 1.13430044  | 1.024760408 | 1.255549569 | 0.01501581  |
| LINC02525  | 1.133553562 | 1.04000861  | 1.235512538 | 0.004335358 |
| AL356215.1 | 1.133316649 | 1.012657954 | 1.268351887 | 0.029333935 |
| AC023347.1 | 1.133219481 | 1.018740123 | 1.260563282 | 0.021353936 |
| LINC01518  | 1.1331444   | 1.028768839 | 1.248109568 | 0.011237355 |
| AL589182.1 | 1.132860552 | 1.009325708 | 1.27151525  | 0.034214715 |
| AC074135.1 | 1.132250933 | 1.029573063 | 1.245168722 | 0.010441853 |
| CU104787.1 | 1.132086478 | 1.007962581 | 1.271495409 | 0.036276256 |
| LINC01224  | 1.132036151 | 1.056742301 | 1.212694757 | 0.000413029 |
| AL133467.2 | 1.131981584 | 1.028300737 | 1.246116297 | 0.011426843 |
| AL138974.1 | 1.131740359 | 1.018917878 | 1.25705542  | 0.020902489 |
| AL358394.1 | 1.131070864 | 1.011940096 | 1.264226316 | 0.030083513 |
| AC015912.3 | 1.130458814 | 1.000164709 | 1.277726678 | 0.049692677 |
| AC097652.1 | 1.130270331 | 1.013018007 | 1.261094089 | 0.028421111 |
| MIR663AHG  | 1.129567909 | 1.052796831 | 1.211937217 | 0.000692157 |
| DSCR4-IT1  | 1.129523726 | 1.017677072 | 1.253662761 | 0.022060385 |
| AC006273.1 | 1.129381949 | 1.019142668 | 1.251545664 | 0.020243385 |
| AC092667.1 | 1.129225342 | 1.017390383 | 1.253353573 | 0.022372929 |
| LINC02152  | 1.12910127  | 1.004785418 | 1.268797949 | 0.041332536 |
| LINC01511  | 1.128384176 | 1.014788185 | 1.254696171 | 0.025672809 |
| AC009275.1 | 1.128346884 | 1.041267027 | 1.22270912  | 0.003210878 |
| AC109830.1 | 1.127221259 | 1.025990152 | 1.238440509 | 0.012617023 |
| LINC02588  | 1.126750526 | 1.0433597   | 1.216806389 | 0.002350846 |
| LINC00858  | 1.126684129 | 1.0151381   | 1.250487126 | 0.024933896 |
| ZFPM2-AS1  | 1.126436809 | 1.058046765 | 1.19924745  | 0.000194855 |
| HOXA-AS3   | 1.12582234  | 1.010378908 | 1.254456058 | 0.031791566 |
| AC124067.4 | 1.125638947 | 1.053918778 | 1.202239743 | 0.000426078 |
| AC079209.1 | 1.125565295 | 1.030178527 | 1.22978416  | 0.008843912 |
| AL133370.1 | 1.124801175 | 1.026679716 | 1.232300262 | 0.011558469 |
| AC016717.2 | 1.12425191  | 1.047232809 | 1.206935407 | 0.001218237 |

|              |             |             |             |             |
|--------------|-------------|-------------|-------------|-------------|
| LINC00601    | 1.12397237  | 1.00982801  | 1.251018862 | 0.032438926 |
| AL139412.1   | 1.123811919 | 1.00377597  | 1.258202296 | 0.042830545 |
| AL139042.1   | 1.123775837 | 1.013726165 | 1.245772454 | 0.02647142  |
| AC064853.1   | 1.123384626 | 1.0068669   | 1.253386141 | 0.037301111 |
| ZIM2-AS1     | 1.12328715  | 1.018685251 | 1.238629911 | 0.019744193 |
| AL133467.4   | 1.122973362 | 1.024507432 | 1.230902903 | 0.01324629  |
| AL137026.2   | 1.121594084 | 1.014352904 | 1.240173201 | 0.025228478 |
| LINC01532    | 1.119489352 | 1.026678022 | 1.220690793 | 0.010581581 |
| CASC8        | 1.11890762  | 1.010720249 | 1.238675354 | 0.030350479 |
| AC103770.1   | 1.118754664 | 1.002136743 | 1.248943326 | 0.045720203 |
| LINC02466    | 1.116967639 | 1.010651123 | 1.234468233 | 0.030191342 |
| LINC00668    | 1.116810601 | 1.045267816 | 1.193250094 | 0.001072929 |
| LINC01748    | 1.11634021  | 1.04034274  | 1.197889326 | 0.002217727 |
| LINC01793    | 1.116047577 | 1.027797474 | 1.211875127 | 0.008992843 |
| TMEM132D-AS1 | 1.116003207 | 1.044488415 | 1.192414527 | 0.0011616   |
| IGFL2-AS1    | 1.115887946 | 1.007525703 | 1.235904855 | 0.035394521 |
| AC132807.2   | 1.115606392 | 1.016940381 | 1.223845219 | 0.020584438 |
| ADGRD1-AS1   | 1.113325462 | 1.026400511 | 1.20761201  | 0.009647429 |
| AL035045.1   | 1.112725976 | 1.00653594  | 1.230119113 | 0.036863766 |
| SLC7A11-AS1  | 1.112321088 | 1.007246327 | 1.228357125 | 0.03550274  |
| LINC00491    | 1.111253013 | 1.023552585 | 1.206467823 | 0.011903983 |
| AC091987.1   | 1.1108447   | 1.016368062 | 1.214103429 | 0.020451156 |
| LINC00664    | 1.109311306 | 1.008291034 | 1.220452759 | 0.033216892 |
| AC011632.1   | 1.109029345 | 1.036348989 | 1.186806859 | 0.00276811  |
| USP2-AS1     | 1.108790392 | 1.010291144 | 1.216892912 | 0.029580093 |
| AC109588.1   | 1.108463523 | 1.033870046 | 1.188438901 | 0.003766586 |
| LINC01559    | 1.107825016 | 1.037419384 | 1.183008806 | 0.002239307 |
| AL136537.2   | 1.107610966 | 1.030263083 | 1.190765808 | 0.0056545   |
| LUCAT1       | 1.106466703 | 1.035990305 | 1.181737473 | 0.002587376 |
| AC005381.1   | 1.105428757 | 1.014439831 | 1.204578823 | 0.022190494 |
| LINC00879    | 1.103777618 | 1.015996585 | 1.19914284  | 0.01952708  |
| MIR646HG     | 1.103518047 | 1.014677246 | 1.200137369 | 0.021436303 |
| GPR1-AS      | 1.103368878 | 1.02108155  | 1.19228761  | 0.01286327  |
| AL590004.3   | 1.102248143 | 1.016964442 | 1.194683825 | 0.017817541 |
| LINC02475    | 1.101650821 | 1.020580053 | 1.189161526 | 0.01305371  |
| AL451069.1   | 1.101153063 | 1.001284218 | 1.210982901 | 0.046986574 |
| LINC01929    | 1.101020588 | 1.002710154 | 1.20896984  | 0.043729019 |
| LINC02327    | 1.100843604 | 1.011139205 | 1.198506233 | 0.026732713 |
| AC114485.1   | 1.09993191  | 1.009320372 | 1.198678081 | 0.029896023 |
| HOXC-AS1     | 1.097299892 | 1.000821791 | 1.203078374 | 0.047989851 |
| AC010615.2   | 1.096850476 | 1.007123114 | 1.194571895 | 0.033756554 |
| AC093895.1   | 1.095545588 | 1.018479402 | 1.178443211 | 0.014207331 |
| FAM230C      | 1.095301688 | 1.014857003 | 1.182122983 | 0.019341318 |
| AL117329.1   | 1.094001691 | 1.003115869 | 1.193122089 | 0.042329372 |

|            |             |             |             |             |
|------------|-------------|-------------|-------------|-------------|
| LINC02562  | 1.093675014 | 1.002547708 | 1.193085403 | 0.043665555 |
| AC069277.1 | 1.09228371  | 1.007611798 | 1.184070796 | 0.032020061 |
| TCL6       | 1.091779829 | 1.01020916  | 1.179937029 | 0.026668166 |
| BBOX1-AS1  | 1.091395189 | 1.008640634 | 1.180939393 | 0.029719302 |
| LINC02253  | 1.091329529 | 1.01115773  | 1.17785792  | 0.024768822 |
| AC006305.1 | 1.090992491 | 1.0105928   | 1.177788536 | 0.025764046 |
| AC023090.1 | 1.090295775 | 1.009908493 | 1.177081771 | 0.026947321 |
| LINC00942  | 1.090152634 | 1.035619934 | 1.147556866 | 0.000978197 |
| LINC01139  | 1.088979739 | 1.028021214 | 1.153552919 | 0.003728735 |
| AC016710.1 | 1.088349134 | 1.008573028 | 1.17443537  | 0.029276107 |
| AC116049.2 | 1.088282955 | 1.001274687 | 1.182852023 | 0.046598961 |
| LINC02159  | 1.087671851 | 1.000547657 | 1.182382516 | 0.048516457 |
| AL139023.1 | 1.087551133 | 1.001350849 | 1.181171882 | 0.046370606 |
| G2E3-AS1   | 1.085999045 | 1.00425008  | 1.174402621 | 0.038811529 |
| AL109615.3 | 1.085815439 | 1.010510848 | 1.166731827 | 0.024762479 |
| AC007639.1 | 1.085588488 | 1.005132809 | 1.172484228 | 0.036592975 |
| LINC01436  | 1.085313238 | 1.019074171 | 1.155857796 | 0.01083347  |
| AC006206.2 | 1.084174144 | 1.0067977   | 1.167497278 | 0.032411991 |
| LINC01234  | 1.082849796 | 1.026037665 | 1.142807639 | 0.003794046 |
| AC068506.1 | 1.082299607 | 1.000423412 | 1.170876677 | 0.048779808 |
| LINC02188  | 1.082069522 | 1.000233813 | 1.170600748 | 0.049322809 |
| LHFPL3-AS2 | 1.081550544 | 1.01505469  | 1.152402517 | 0.015456061 |
| CASC20     | 1.079030761 | 1.0036287   | 1.160097737 | 0.039593558 |
| AC005186.1 | 1.078949281 | 1.005868865 | 1.157339283 | 0.033712711 |
| LINC00511  | 1.078339002 | 1.005196693 | 1.156803451 | 0.035326243 |
| LINC00648  | 1.076323798 | 1.011691962 | 1.145084632 | 0.019919433 |
| LINC01194  | 1.07567411  | 1.010848606 | 1.144656859 | 0.021436715 |
| PART1      | 1.075572956 | 1.013114545 | 1.141881922 | 0.016994328 |
| CASC9      | 1.073287297 | 1.023044183 | 1.125997919 | 0.003836081 |
| AF279873.3 | 1.073221837 | 1.004684453 | 1.146434691 | 0.035837341 |
| ELFN1-AS1  | 1.072396724 | 1.002414877 | 1.147264231 | 0.042354961 |
| DSCR4      | 1.072216911 | 1.003510081 | 1.145627857 | 0.039049426 |
| AC010894.3 | 1.071959647 | 1.001796384 | 1.147036967 | 0.04422744  |
| LINC02377  | 1.070388014 | 1.000566018 | 1.145082364 | 0.048108881 |
| LINC01667  | 1.067105794 | 1.011457644 | 1.125815581 | 0.017459885 |
| LINC01446  | 1.066237313 | 1.002388526 | 1.134153053 | 0.041781912 |
| LINC01833  | 1.064999189 | 1.001398484 | 1.132639294 | 0.045022279 |
| LINC02055  | 1.063679628 | 1.000694997 | 1.130628568 | 0.047448757 |
| AC245100.6 | 1.062831566 | 1.001796351 | 1.127585399 | 0.043441333 |
| LINC02506  | 1.054800682 | 1.001867533 | 1.110530527 | 0.04225594  |
| AC079466.1 | 1.054708499 | 1.010684003 | 1.100650662 | 0.014345773 |
| LINC00221  | 1.048417732 | 1.002667753 | 1.096255203 | 0.037801898 |
| DIO3OS     | 0.94054187  | 0.885999888 | 0.998441446 | 0.0443109   |
| LINC01018  | 0.940053147 | 0.901238729 | 0.980539218 | 0.004060093 |

|             |             |             |             |             |
|-------------|-------------|-------------|-------------|-------------|
| FAM99A      | 0.937176058 | 0.892461588 | 0.98413083  | 0.009287674 |
| AL035661.1  | 0.933557741 | 0.876926144 | 0.993846587 | 0.031296675 |
| FAM99B      | 0.925029179 | 0.869509594 | 0.984093778 | 0.013598766 |
| LINC01093   | 0.923278773 | 0.866394511 | 0.983897845 | 0.013882277 |
| AC092384.2  | 0.922231502 | 0.852701903 | 0.997430568 | 0.042940061 |
| TSPEAR-AS1  | 0.921571036 | 0.857912901 | 0.98995268  | 0.025320605 |
| AL161645.1  | 0.91903781  | 0.853067499 | 0.990109805 | 0.026317594 |
| AC136475.3  | 0.917210023 | 0.851238311 | 0.9882946   | 0.023260426 |
| AP003716.1  | 0.916997124 | 0.858620911 | 0.979342239 | 0.009824272 |
| AC079360.1  | 0.915257935 | 0.848348    | 0.987445114 | 0.022245107 |
| AC004160.1  | 0.914947302 | 0.847797948 | 0.987415183 | 0.022276912 |
| AL137798.1  | 0.913762878 | 0.840765928 | 0.993097567 | 0.033752439 |
| AC116025.1  | 0.908920584 | 0.82701389  | 0.998939241 | 0.047480243 |
| AC020978.4  | 0.906526993 | 0.828833676 | 0.991503137 | 0.031823477 |
| AL391095.2  | 0.900094128 | 0.825615939 | 0.981290938 | 0.016915204 |
| AC253536.6  | 0.898531386 | 0.820407528 | 0.984094641 | 0.02114203  |
| AL354872.2  | 0.898102977 | 0.823190639 | 0.979832519 | 0.015587357 |
| AC138356.1  | 0.897287231 | 0.809325109 | 0.994809583 | 0.039511465 |
| AC254629.1  | 0.896944212 | 0.811468939 | 0.991422937 | 0.033291703 |
| AL590079.1  | 0.895659524 | 0.807307885 | 0.993680351 | 0.037561563 |
| AC079061.1  | 0.892036414 | 0.825065222 | 0.964443711 | 0.004115569 |
| AC243836.1  | 0.890961567 | 0.796403061 | 0.996747191 | 0.043708002 |
| AC016395.1  | 0.888379585 | 0.803005431 | 0.982830571 | 0.02168074  |
| AC004832.5  | 0.888371166 | 0.794583645 | 0.99322876  | 0.037588107 |
| AC099508.2  | 0.88802402  | 0.815203486 | 0.96734947  | 0.006520714 |
| AC115619.1  | 0.88465895  | 0.822533825 | 0.951476322 | 0.000970733 |
| AL161668.4  | 0.884316818 | 0.81008829  | 0.965346918 | 0.005988768 |
| AC004160.2  | 0.883684123 | 0.792456595 | 0.985413755 | 0.026130426 |
| AL161740.1  | 0.883491291 | 0.788720519 | 0.989649493 | 0.032380586 |
| SERTAD4-AS1 | 0.883035184 | 0.788492181 | 0.988914228 | 0.031326206 |
| SLC6A1-AS1  | 0.879459671 | 0.792315365 | 0.976188709 | 0.015838307 |
| AL078590.3  | 0.878969594 | 0.783561247 | 0.985995097 | 0.027768181 |
| HAO2-IT1    | 0.876787617 | 0.776275356 | 0.990314221 | 0.034290529 |
| LINC02127   | 0.876532566 | 0.774479626 | 0.992032991 | 0.036922654 |
| AL139385.1  | 0.876135944 | 0.794992835 | 0.965561144 | 0.007659479 |
| AC118754.1  | 0.875796269 | 0.777377447 | 0.986675273 | 0.029219179 |
| AL365361.1  | 0.87437808  | 0.793996039 | 0.962897785 | 0.006364501 |
| MIR99AHG    | 0.873862815 | 0.787877059 | 0.969232714 | 0.010732621 |
| CLRN1-AS1   | 0.872071637 | 0.766939625 | 0.991615135 | 0.036758975 |
| AC106822.1  | 0.871544778 | 0.781543249 | 0.971910768 | 0.013425052 |
| LINC02362   | 0.870549282 | 0.80393635  | 0.94268166  | 0.000641862 |
| AL133467.1  | 0.86812278  | 0.775086627 | 0.972326362 | 0.014477744 |
| SNX29P2     | 0.868031199 | 0.758771444 | 0.993023879 | 0.039211801 |
| AC019257.1  | 0.862697601 | 0.779049643 | 0.95532699  | 0.004536501 |

|             |             |             |             |             |
|-------------|-------------|-------------|-------------|-------------|
| AC009159.3  | 0.859034008 | 0.740260628 | 0.996864347 | 0.045356909 |
| AL354714.1  | 0.857781242 | 0.740085859 | 0.994193646 | 0.041620029 |
| AC010280.2  | 0.857311685 | 0.779706793 | 0.942640659 | 0.001472005 |
| LINC00702   | 0.855916957 | 0.761378898 | 0.962193514 | 0.009178277 |
| F11-AS1     | 0.854735806 | 0.783981243 | 0.931875992 | 0.000370341 |
| AC139887.4  | 0.854039457 | 0.739610932 | 0.986171731 | 0.031580091 |
| AC011365.1  | 0.849390448 | 0.756187031 | 0.954081602 | 0.005912106 |
| AL135999.1  | 0.849329426 | 0.735472404 | 0.980812428 | 0.026163108 |
| AL031722.1  | 0.846850861 | 0.738256025 | 0.971419612 | 0.017592099 |
| CPS1-IT1    | 0.845660802 | 0.770779334 | 0.92781703  | 0.00039449  |
| AC007364.1  | 0.843262007 | 0.731147732 | 0.972567897 | 0.019175286 |
| VIPR1-AS1   | 0.839303503 | 0.71690187  | 0.982603616 | 0.029393483 |
| LINC02259   | 0.83500129  | 0.725024434 | 0.961660216 | 0.01233152  |
| AC025259.3  | 0.833846589 | 0.730180969 | 0.952229876 | 0.007304756 |
| AC007278.1  | 0.833076244 | 0.705968483 | 0.983069421 | 0.030609119 |
| AC092378.1  | 0.832678686 | 0.706852624 | 0.980902907 | 0.02847742  |
| AL109933.1  | 0.830725101 | 0.718361404 | 0.960664354 | 0.012377807 |
| AP001065.1  | 0.826788424 | 0.76059539  | 0.898742099 | 7.92E-06    |
| AC016586.1  | 0.826672562 | 0.701633261 | 0.973995338 | 0.022914198 |
| LINC00402   | 0.825486403 | 0.745236697 | 0.91437768  | 0.000237475 |
| B4GALT1-AS1 | 0.822715372 | 0.70495147  | 0.960152026 | 0.013290851 |
| AC012629.2  | 0.821364557 | 0.684894662 | 0.985027001 | 0.03377946  |
| AP001107.5  | 0.821100695 | 0.699173421 | 0.964290592 | 0.016246622 |
| LINC02427   | 0.818690922 | 0.69751008  | 0.960924932 | 0.014379145 |
| SOCS2-AS1   | 0.818576525 | 0.734412745 | 0.912385483 | 0.000298748 |
| TMEM220-AS1 | 0.813961751 | 0.737985355 | 0.897760001 | 3.83E-05    |
| AC009084.1  | 0.813740919 | 0.670071441 | 0.988214454 | 0.03756402  |
| LINC01537   | 0.813256997 | 0.709730427 | 0.931884724 | 0.002925774 |
| PGM5P3-AS1  | 0.807730949 | 0.668331268 | 0.976206436 | 0.027167428 |
| AL136084.3  | 0.802847497 | 0.700833973 | 0.919710129 | 0.001539661 |
| LINC02580   | 0.799724669 | 0.702366439 | 0.91057817  | 0.000739984 |
| AL359076.1  | 0.798827644 | 0.658762941 | 0.96867259  | 0.022397521 |
| AC022784.5  | 0.7978765   | 0.704971855 | 0.903024575 | 0.000350312 |
| C9orf163    | 0.796419309 | 0.680474255 | 0.932120079 | 0.004573599 |
| AL139246.1  | 0.792138578 | 0.674353982 | 0.930495769 | 0.004553509 |
| AC090618.1  | 0.786058208 | 0.663246388 | 0.931610811 | 0.005482094 |
| AC015908.3  | 0.779866384 | 0.705544989 | 0.862016718 | 1.14E-06    |
| AC107396.1  | 0.776277192 | 0.607740784 | 0.991551488 | 0.042570029 |
| AL138995.1  | 0.776003685 | 0.649757149 | 0.926779674 | 0.005121067 |
| CLLU1       | 0.757385225 | 0.57363355  | 0.999997959 | 0.049998317 |
| AC133919.1  | 0.729244077 | 0.59447432  | 0.894566688 | 0.002456278 |
| HTR2A-AS1   | 0.692235701 | 0.555679731 | 0.862349728 | 0.001034688 |

**Table S5.** Survival related DE-miRNAs screened by univariate Cox analysis

| id              | HR          | HR.95L      | HR.95H      | P-value     |
|-----------------|-------------|-------------|-------------|-------------|
| hsa-miR-3680-3p | 1.45243273  | 1.191463351 | 1.770562925 | 0.000221141 |
| hsa-miR-7-5p    | 1.416476056 | 1.21678896  | 1.648933778 | 7.10E-06    |
| hsa-miR-5003-3p | 1.409974013 | 1.167088006 | 1.703407718 | 0.000368357 |
| hsa-miR-3682-3p | 1.405401998 | 1.170892561 | 1.6868796   | 0.000258417 |
| hsa-miR-3677-3p | 1.394604984 | 1.191047586 | 1.632951602 | 3.60E-05    |
| hsa-miR-3127-5p | 1.353322907 | 1.099885924 | 1.665157132 | 0.004238155 |
| hsa-miR-760     | 1.32322982  | 1.12652023  | 1.554288249 | 0.000647776 |
| hsa-miR-548f-3p | 1.283794308 | 1.082110801 | 1.523067531 | 0.004170762 |
| hsa-miR-5010-3p | 1.274203531 | 1.052735354 | 1.542262861 | 0.012863673 |
| hsa-miR-1180-3p | 1.268723141 | 1.089559993 | 1.477347204 | 0.002182137 |
| hsa-miR-3189-3p | 1.259054822 | 1.091395514 | 1.452469819 | 0.00158062  |
| hsa-miR-653-3p  | 1.242907299 | 1.069710191 | 1.444146804 | 0.004509981 |
| hsa-miR-421     | 1.242767495 | 1.04448596  | 1.478690097 | 0.014255721 |
| hsa-miR-3660    | 1.238887284 | 1.071993317 | 1.431764246 | 0.003712011 |
| hsa-miR-301a-3p | 1.238306098 | 1.046744514 | 1.464924796 | 0.0126756   |
| hsa-miR-326     | 1.232744074 | 1.06886406  | 1.421750445 | 0.004040251 |
| hsa-miR-3677-5p | 1.231964511 | 1.053817479 | 1.440227161 | 0.008851204 |
| hsa-miR-4746-5p | 1.227594666 | 1.046388389 | 1.440180987 | 0.011855162 |
| hsa-miR-561-5p  | 1.226239599 | 1.084079844 | 1.387041336 | 0.001178264 |
| hsa-miR-4784    | 1.225636432 | 1.031706258 | 1.456019726 | 0.020605092 |
| hsa-miR-188-5p  | 1.22326964  | 1.024068468 | 1.461219303 | 0.026268376 |
| hsa-miR-147b-3p | 1.209614641 | 1.043854615 | 1.401696711 | 0.011382174 |
| hsa-miR-877-5p  | 1.193353601 | 1.012937834 | 1.40590347  | 0.0345431   |
| hsa-miR-1266-5p | 1.190747307 | 1.033441021 | 1.37199813  | 0.015735698 |
| hsa-miR-4664-3p | 1.185623636 | 1.00997252  | 1.39182342  | 0.03741031  |
| hsa-miR-137-3p  | 1.182416114 | 1.069974758 | 1.30667369  | 0.001014106 |
| hsa-miR-9-3p    | 1.179752853 | 1.081650674 | 1.286752577 | 0.000190036 |
| hsa-miR-4661-5p | 1.168696887 | 1.025668094 | 1.331670959 | 0.019259288 |
| hsa-miR-200c-5p | 1.163075311 | 1.005800396 | 1.344942977 | 0.041551076 |
| hsa-miR-31-5p   | 1.15510321  | 1.021721631 | 1.305897209 | 0.021266425 |
| hsa-miR-9-5p    | 1.14953132  | 1.067537945 | 1.237822282 | 0.000223398 |
| hsa-miR-3200-3p | 1.138135351 | 1.020534361 | 1.269288058 | 0.020059047 |
| hsa-miR-767-3p  | 1.130219138 | 1.026209941 | 1.244769953 | 0.012946734 |
| hsa-miR-1270    | 1.119266195 | 1.003101106 | 1.248883893 | 0.043868353 |
| hsa-miR-4652-5p | 1.085228336 | 1.013811001 | 1.161676624 | 0.018528422 |
| hsa-miR-767-5p  | 1.083948302 | 1.032023203 | 1.138485954 | 0.001288632 |
| hsa-miR-105-5p  | 1.079724981 | 1.030432352 | 1.131375613 | 0.001293639 |
| hsa-miR-5589-5p | 0.921520703 | 0.852421466 | 0.996221283 | 0.039863301 |
| hsa-miR-5589-3p | 0.916956171 | 0.844548695 | 0.995571509 | 0.038855206 |
| hsa-miR-122-3p  | 0.909269739 | 0.842486983 | 0.981346269 | 0.014534962 |
| hsa-miR-2114-5p | 0.89891145  | 0.811867814 | 0.995287386 | 0.040279722 |
| hsa-miR-204-5p  | 0.881521848 | 0.791193717 | 0.982162462 | 0.022238169 |



---

|                |             |             |             |             |
|----------------|-------------|-------------|-------------|-------------|
| hsa-miR-490-3p | 0.877296474 | 0.772681467 | 0.996075532 | 0.043315068 |
| hsa-miR-195-5p | 0.848261876 | 0.73960156  | 0.97288628  | 0.01862295  |
| hsa-let-7c-3p  | 0.834079742 | 0.732505935 | 0.949738403 | 0.006175776 |
| hsa-let-7c-5p  | 0.809452846 | 0.714222941 | 0.917380096 | 0.000931914 |
| hsa-miR-542-5p | 0.794126886 | 0.673958183 | 0.935722018 | 0.005894615 |
| hsa-miR-30d-5p | 0.789898158 | 0.658764716 | 0.947134971 | 0.0108853   |
| hsa-miR-34a-5p | 0.776302645 | 0.651006598 | 0.925713808 | 0.004810526 |
| hsa-miR-139-3p | 0.775900481 | 0.682837306 | 0.881647138 | 9.93E-05    |
| hsa-miR-660-5p | 0.775482851 | 0.631550108 | 0.952218429 | 0.015208942 |
| hsa-miR-139-5p | 0.715228672 | 0.632588288 | 0.808665071 | 8.79E-08    |
| hsa-miR-101-3p | 0.70255517  | 0.584924782 | 0.843841435 | 0.000159325 |

---

**Table S6.** Survival related HR-DEmRNAs screened by univariate Cox analysis

| id      | HR          | HR.95L      | HR.95H      | P-value     |
|---------|-------------|-------------|-------------|-------------|
| SAP30   | 1.425580195 | 1.1480045   | 1.770270842 | 0.001331095 |
| SLC2A1  | 1.321323598 | 1.173594896 | 1.487647959 | 4.10E-06    |
| ALDOA   | 1.302877164 | 1.112378599 | 1.525999249 | 0.001036363 |
| ANXA2   | 1.274429412 | 1.064190168 | 1.526203094 | 0.008380938 |
| STC2    | 1.263574017 | 1.119922891 | 1.425651094 | 0.000145076 |
| GAPDH   | 1.247274221 | 1.019360878 | 1.526145466 | 0.031855296 |
| NDRG1   | 1.220773069 | 1.072197449 | 1.389936983 | 0.002588579 |
| PPFIA4  | 1.210447466 | 1.111127957 | 1.318644769 | 1.23E-05    |
| EFNA3   | 1.193576264 | 1.057448879 | 1.347227585 | 0.004182391 |
| PFKP    | 1.18035584  | 1.066476112 | 1.306395795 | 0.00135867  |
| PGF     | 1.165433868 | 1.028662614 | 1.320390264 | 0.016232096 |
| LOX     | 1.1491568   | 1.025371364 | 1.287885928 | 0.016810632 |
| KDELRL3 | 1.145858345 | 1.015316936 | 1.293183735 | 0.027364202 |
| DPYSL4  | 1.137980992 | 1.054070788 | 1.22857094  | 0.000941545 |
| KIF5A   | 1.137379752 | 1.04143547  | 1.242163089 | 0.004197617 |
| ENO2    | 1.130077213 | 1.015733981 | 1.257292294 | 0.024652891 |
| HK2     | 1.113928068 | 1.02561392  | 1.20984682  | 0.010464845 |
| TKTL1   | 1.093492133 | 1.020370757 | 1.171853502 | 0.011372312 |
| SLC2A5  | 1.067657378 | 1.003140329 | 1.136323846 | 0.039536942 |
| DCN     | 0.928008504 | 0.869625035 | 0.990311626 | 0.024220045 |
| PCK1    | 0.925320854 | 0.875063233 | 0.978464928 | 0.006448971 |
| ALDOB   | 0.916118854 | 0.865984484 | 0.96915565  | 0.002280371 |
| FBP1    | 0.880748873 | 0.811525341 | 0.955877209 | 0.002362277 |
| DUSP1   | 0.865359146 | 0.756478405 | 0.989911207 | 0.035051838 |
| ATF3    | 0.815535428 | 0.687661544 | 0.967188059 | 0.019110483 |

**Table S7.** The regulatory relationship between seven HR-DEmRNAs-os and six DEmiRNA-os

| miRNA                 | mRNA    |
|-----------------------|---------|
| hsa-miR-7-5p          | ENO2    |
| hsa-miR-34a-5p        | KDELRL3 |
| hsa-miR-34a-5p        | PGF     |
| <b>hsa-miR-101-3p</b> | PPFIA4  |
| <b>hsa-miR-101-3p</b> | SAP30   |
| hsa-miR-30d-5p        | SAP30   |
| hsa-miR-301a-3p       | SLC2A1  |
| <b>hsa-miR-101-3p</b> | TKTL1   |
| <b>hsa-miR-195-5p</b> | TKTL1   |

**Table S8.** The regulatory relationship between six DEmiRNA-os and 17 DElncRNA-os

| lncRNA     | miRNA           |
|------------|-----------------|
| SNHG1      | hsa-miR-101-3p  |
| AC005540.1 | hsa-miR-195-5p  |
| AC090772.3 | hsa-miR-195-5p  |
| CASC9      | hsa-miR-195-5p  |
| LINC00511  | hsa-miR-195-5p  |
| LINC01703  | hsa-miR-195-5p  |
| SNHG1      | hsa-miR-195-5p  |
| SNHG12     | hsa-miR-195-5p  |
| AP003469.4 | hsa-miR-301a-3p |
| AC138150.2 | hsa-miR-30d-5p  |
| AL390728.6 | hsa-miR-30d-5p  |
| LINC01139  | hsa-miR-30d-5p  |
| AC073529.1 | hsa-miR-34a-5p  |
| AL365361.1 | hsa-miR-34a-5p  |
| MYLK-AS1   | hsa-miR-34a-5p  |
| AC012146.1 | hsa-miR-7-5p    |
| BACE1-AS   | hsa-miR-7-5p    |
| RHPN1-AS1  | hsa-miR-7-5p    |
| SNHG1      | hsa-miR-7-5p    |

**Table S11.** Correlation between the expressions of seven HR-DEmRNA-os in hypoxia-associated ceRNA network and drug susceptibility of FDA-approved antitumor drugs in NCI-60 cancer cell line data

| Gene   | Drug              | cor          | P-value     |
|--------|-------------------|--------------|-------------|
| ENO2   | Docetaxel         | -0.363931299 | 0.004257467 |
| ENO2   | Paclitaxel        | -0.331330157 | 0.009710338 |
| ENO2   | Eribulin mesilate | -0.329886559 | 0.010052079 |
| ENO2   | Allopurinol       | -0.321672869 | 0.012201806 |
| ENO2   | Vinorelbine       | -0.30320039  | 0.018527508 |
| ENO2   | brigatinib        | -0.292711897 | 0.023231814 |
| ENO2   | Carfilzomib       | -0.292519726 | 0.023326648 |
| ENO2   | 6-MERCAPTOPURINE  | -0.274210683 | 0.033991762 |
| ENO2   | Celecoxib         | -0.269913871 | 0.037010799 |
| ENO2   | Sonidegib         | -0.264823653 | 0.040871658 |
| ENO2   | Vinblastine       | -0.257065435 | 0.047390663 |
| ENO2   | Actinomycin D     | -0.254271331 | 0.04993754  |
| ENO2   | Midostaurin       | 0.285390308  | 0.027083569 |
| KDELR3 | Valrubicin        | -0.477126714 | 0.000116002 |
| KDELR3 | Cyclophosphamide  | -0.469848508 | 0.00015214  |
| KDELR3 | Teniposide        | -0.437839366 | 0.000467796 |
| KDELR3 | Palbociclib       | -0.436460097 | 0.000489801 |

|       |                           |              |             |
|-------|---------------------------|--------------|-------------|
| KDEL3 | Daunorubicin              | -0.43240181  | 0.000560107 |
| KDEL3 | Oxaliplatin               | -0.431836951 | 0.000570586 |
| KDEL3 | Etoposide                 | -0.426820415 | 0.000671754 |
| KDEL3 | Pipobroman                | -0.414999485 | 0.000977257 |
| KDEL3 | Nitrogen mustard          | -0.403058727 | 0.001407912 |
| KDEL3 | Nelarabine                | -0.397342296 | 0.001668991 |
| KDEL3 | Dexrazoxane               | -0.392772785 | 0.00190802  |
| KDEL3 | Thiotepa                  | -0.384467139 | 0.002421962 |
| KDEL3 | Hydroxyurea               | -0.379065008 | 0.002819224 |
| KDEL3 | Cytarabine                | -0.377261066 | 0.002964233 |
| KDEL3 | Bendamustine              | -0.376984292 | 0.002987058 |
| KDEL3 | Asparaginase              | -0.369520533 | 0.00366447  |
| KDEL3 | DACARBAZINE               | -0.362566167 | 0.004414587 |
| KDEL3 | Triethylenemelamine       | -0.358055895 | 0.004970683 |
| KDEL3 | Ifosfamide                | -0.355867997 | 0.005262003 |
| KDEL3 | Idarubicin                | -0.355761857 | 0.005276509 |
| KDEL3 | Epirubicin                | -0.349566785 | 0.006186576 |
| KDEL3 | Raloxifene                | -0.347923617 | 0.006449935 |
| KDEL3 | Fluphenazine              | -0.345051052 | 0.006933983 |
| KDEL3 | 6-MERCAPTOPURINE          | -0.340054031 | 0.007852011 |
| KDEL3 | Melphalan                 | -0.336779108 | 0.008509642 |
| KDEL3 | DECITABINE                | -0.324233186 | 0.011492742 |
| KDEL3 | Mitoxantrone              | -0.323854924 | 0.011595203 |
| KDEL3 | DIGOXIN                   | -0.323339919 | 0.011735973 |
| KDEL3 | Chlorambucil              | -0.3201935   | 0.01262847  |
| KDEL3 | Dromostanolone Propionate | -0.319762249 | 0.012755242 |
| KDEL3 | Uracil mustard            | -0.318715576 | 0.013067497 |
| KDEL3 | Eribulin mesilate         | -0.318693512 | 0.013074149 |
| KDEL3 | Carfilzomib               | -0.31750899  | 0.013435606 |
| KDEL3 | Docetaxel                 | -0.315550365 | 0.01405215  |
| KDEL3 | Vinblastine               | -0.313038903 | 0.014878171 |
| KDEL3 | LDK-378                   | -0.308629304 | 0.016429443 |
| KDEL3 | Homoharringtonine         | -0.306539629 | 0.017211623 |
| KDEL3 | Actinomycin D             | -0.303576906 | 0.018374973 |
| KDEL3 | Doxorubicin               | -0.302425062 | 0.018845014 |
| KDEL3 | Paclitaxel                | -0.301607771 | 0.019184709 |
| KDEL3 | METHOTREXATE              | -0.300183532 | 0.01978913  |
| KDEL3 | BMN-673                   | -0.296647618 | 0.021360092 |
| KDEL3 | 6-Thioguanine             | -0.289973032 | 0.024614634 |
| KDEL3 | Dexamethasone Decadron    | -0.289448084 | 0.024887452 |
| KDEL3 | Raltitrexed               | -0.288864184 | 0.025193899 |
| KDEL3 | Irinotecan                | -0.288089814 | 0.02560521  |
| KDEL3 | Cladribine                | -0.283981203 | 0.027883328 |
| KDEL3 | Crizotinib                | -0.282920133 | 0.02849856  |

|        |                          |              |             |
|--------|--------------------------|--------------|-------------|
| KDEL3  | Fludarabine              | -0.281437481 | 0.029377272 |
| KDEL3  | Fluorouracil             | -0.274384724 | 0.033873932 |
| KDEL3  | Vincristine              | -0.268661465 | 0.037931491 |
| KDEL3  | Isotretinoin             | -0.259054727 | 0.045643005 |
| KDEL3  | Lomustine                | -0.255995649 | 0.048352929 |
| KDEL3  | Cabozantinib             | 0.256012135  | 0.04833798  |
| KDEL3  | Encorafenib              | 0.258046675  | 0.046521884 |
| KDEL3  | Idelalisib               | 0.262500701  | 0.042740905 |
| KDEL3  | IPI-145                  | 0.274032266  | 0.034112909 |
| KDEL3  | Abiraterone              | 0.277598648  | 0.031758417 |
| KDEL3  | Simvastatin              | 0.3103659    | 0.015802751 |
| KDEL3  | Zoledronate              | 0.314696918  | 0.014328314 |
| KDEL3  | Irofulven                | 0.316292216  | 0.013815824 |
| PGF    | Gefitinib                | -0.286063225 | 0.026708499 |
| PGF    | Palbociclib              | -0.28599749  | 0.026744945 |
| PGF    | Lapatinib                | -0.282410865 | 0.028797865 |
| PGF    | Allopurinol              | -0.257800736 | 0.0467384   |
| PGF    | Encorafenib              | 0.255806242  | 0.048524954 |
| PGF    | ARRY-162                 | 0.270423714  | 0.036641338 |
| PGF    | Irofulven                | 0.27923532   | 0.030724224 |
| PGF    | Vemurafenib              | 0.320433069  | 0.012558515 |
| PPFIA4 | Dexrazoxane              | -0.260150029 | 0.044703547 |
| PPFIA4 | IPI-145                  | 0.276152087  | 0.032696527 |
| PPFIA4 | Abiraterone              | 0.29677486   | 0.021301779 |
| PPFIA4 | Idelalisib               | 0.297813681  | 0.020830733 |
| SAP30  | Erlotinib                | -0.28213885  | 0.028958809 |
| SAP30  | Arsenic trioxide         | 0.263054711  | 0.042288829 |
| SAP30  | Lomustine                | 0.281176273  | 0.029534408 |
| SAP30  | Carmustine               | 0.33783721   | 0.00829211  |
| SAP30  | Nelarabine               | 0.375244089  | 0.003134181 |
| SAP30  | Ifosfamide               | 0.410794171  | 0.001113055 |
| SLC2A1 | Denileukin Difitox Ontak | -0.341149431 | 0.007642167 |
| SLC2A1 | DIGOXIN                  | -0.282908223 | 0.028505529 |
| SLC2A1 | Arsenic trioxide         | -0.260539819 | 0.044373074 |
| SLC2A1 | Bendamustine             | -0.260393505 | 0.044496885 |
| SLC2A1 | Bortezomib               | -0.257771797 | 0.04676393  |
| SLC2A1 | Ixazomib citrate         | -0.257557848 | 0.046953039 |
| SLC2A1 | Dasatinib                | 0.257470285  | 0.047030616 |
| SLC2A1 | IPI-145                  | 0.25944796   | 0.045303876 |
| SLC2A1 | Irofulven                | 0.265896991  | 0.040031031 |
| SLC2A1 | Simvastatin              | 0.286889008  | 0.026254205 |
| TKTL1  | 6-Thioguanine            | -0.500238155 | 4.70E-05    |
| TKTL1  | Parthenolide             | -0.413381713 | 0.001027622 |
| TKTL1  | Allopurinol              | -0.347091212 | 0.006587058 |

|       |                  |              |             |
|-------|------------------|--------------|-------------|
| TKTL1 | Pazopanib        | -0.29664008  | 0.021363551 |
| TKTL1 | Bosutinib        | -0.286142941 | 0.026664358 |
| TKTL1 | Lapatinib        | -0.280386246 | 0.030013958 |
| TKTL1 | 6-MERCAPTOPURINE | -0.267557154 | 0.038758975 |
| TKTL1 | TYROTHRINICIN    | 0.273473193  | 0.034494855 |

**Table S12.** The expression correlation coefficient of miRNA-lncRNA pairs

| miRNA                 | lncRNA       | R             | <i>P</i> -value |
|-----------------------|--------------|---------------|-----------------|
| <b>hsa-miR-101-3p</b> | <b>SNHG1</b> | <b>-0.357</b> | <b>1.42E-12</b> |
| hsa-miR-195-5p        | LINC01703    | -0.186        | 3.16E-04        |
| hsa-miR-195-5p        | SNHG1        | -0.151        | 3.61E-03        |
| hsa-miR-195-5p        | LINC00511    | -0.147        | 4.48E-03        |
| hsa-miR-195-5p        | CASC9        | -0.139        | 7.38E-03        |
| hsa-miR-195-5p        | AC005540.1   | -0.127        | 1.43E-02        |
| hsa-miR-195-5p        | SNHG12       | -0.095        | 6.74E-02        |
| hsa-miR-195-5p        | AC090772.3   | -0.083        | 1.13E-01        |

**Table S13.** The expression correlation coefficient of mRNA-miRNA pairs

| mRNA          | miRNA                 | R             | <i>P</i> -value |
|---------------|-----------------------|---------------|-----------------|
| <b>PPFIA4</b> | <b>hsa-miR-101-3p</b> | <b>-0.384</b> | <b>1.76E-14</b> |
| <b>TKTL1</b>  | <b>hsa-miR-101-3p</b> | <b>-0.151</b> | <b>3.49E-03</b> |
| <b>SAP30</b>  | <b>hsa-miR-101-3p</b> | <b>-0.143</b> | <b>6.02E-03</b> |
| TKTL1         | hsa-miR-195-5p        | 0.069         | 1.88E-01        |
